# Supplementary material
Source: MDPI journal article supplement (https://www.mdpi.com/2076-3417/12/2/925)
Supplement: s1 [file s1]

## Supplementary material (Python Code)

# This code is provided for understanding of the modeling example.

# As part of the research project, some contents were not shown in this material.

```
import pandas as pd
```

```
import numpy as np
```

```
import plotly
```

```
np.random.seed(0)
```

```
import matplotlib.pyplot as plt
```

```
pd.set_option('display.max_rows', None)
```

```
pd.set_option('display.max_columns', None)
```

```
plt.rcParams["figure.figsize"] = [2, 2]
```

```
plt.rcParams["font.size"] = 10
```

```
data = pd.read_csv('C:/scoliosis.csv') # ,sep=';')
```

```
data.shape
```

```
data.columns
```

```
data['Scoliosis'] = data['Scoliosis'].astype(int)
```

```
data['Scoliosis'].hist()
```

```
import numpy as np
```

```
import pandas as pd
```

```
import os
```

```
from sklearn import metrics
```

```
# Interpretable models
```

```
from sklearn.model_selection import train_test_split
from sklearn.metrics import r2_score
from sklearn.metrics import accuracy_score
import statsmodels.api as sm
from sklearn.linear_model import LogisticRegression
from sklearn.tree import DecisionTreeClassifier
from sklearn.tree import export_graphviz
import graphviz
```

```
X = data.drop(['Scoliosis'], axis=1)
y = data['Scoliosis']
```

```
lr = LogisticRegression(random_state=0)
```

```
##### Performance metric
```

```
def plot_roc_curve(fprs, tprs):
```

```
    """Plot the Receiver Operating Characteristic from a list
    of true positive rates and false positive rates."""
```

```
    # Initialize useful lists + the plot axes.
```

```
    tprs_interp = []
```

```
    aucs = []
```

```
    mean_fpr = np.linspace(0, 1, 100)
```

```
    f, ax = plt.subplots(figsize=(14,10))
```

```
    # Plot ROC for each K-Fold + compute AUC scores.
```

```
    for i, (fpr, tpr) in enumerate(zip(fprs, tprs)):
```

```
        tprs_interp.append(np.interp(mean_fpr, fpr, tpr))
```

```
        tprs_interp[-1][0] = 0.0
```

```
        roc_auc = auc(fpr, tpr)
```

```

aucs.append(roc_auc)

ax.plot(fpr, tpr, lw=1, alpha=0.3,
        label='ROC %d-fold (AUC = %0.2f)' % (i, roc_auc))

# Plot the base line.
plt.plot([0, 1], [0, 1], linestyle='--', lw=3, color='r',
        label='Base', alpha=.8)

# Plot the mean ROC.
mean_tpr = np.mean(tprs_interp, axis=0)
mean_tpr[-1] = 1.0
mean_auc = auc(mean_fpr, mean_tpr)
std_auc = np.std(aucs)
ax.plot(mean_fpr, mean_tpr, color='g',
        label=r'Mean ROC (AUC = %0.2f  $\pm$  %0.2f)' % (mean_auc, std_auc),
        lw=4, alpha=.8)

# Plot the standard deviation around the mean ROC.
std_tpr = np.std(tprs_interp, axis=0)
tprs_upper = np.minimum(mean_tpr + std_tpr, 1)
tprs_lower = np.maximum(mean_tpr - std_tpr, 0)
ax.fill_between(mean_fpr, tprs_lower, tprs_upper, color='grey', alpha=.2,
        label=r' $\pm$  1 std. dev.')

# Fine tune and show the plot.
ax.set_xlim([-0.05, 1.05])
ax.set_ylim([-0.05, 1.05])
ax.set_xlabel('False Positive Rate')
ax.set_ylabel('True Positive Rate')
ax.set_title('Receiver operating characteristic')

```

```
ax.legend(loc="lower right")
```

```
plt.show()
```

```
return (f, ax)
```

```
def compute_roc_auc(index):
```

```
    y_predict = LR.predict_proba(X.iloc[index])[:,1]
```

```
    fpr, tpr, thresholds = roc_curve(y.iloc[index], y_predict)
```

```
    auc_score = auc(fpr, tpr)
```

```
    return fpr, tpr, auc_score
```

```
cv = StratifiedKFold(n_splits=5, random_state=123, shuffle=True)
```

```
results = pd.DataFrame(columns=['training_score', 'test_score'])
```

```
fprs, tprs, scores = [], [], []
```

```
for (train, test), i in zip(cv.split(X, y), range(5)):
```

```
    LR.fit(X.iloc[train], y.iloc[train])
```

```
    auc_score_train = compute_roc_auc(train)
```

```
    fpr, tpr, auc_score = compute_roc_auc(test)
```

```
    scores.append((auc_score_train, auc_score))
```

```
    fprs.append(fpr)
```

```
    tprs.append(tpr)
```

```
plot_roc_curve(fprs, tprs);
```

```
pd.DataFrame(scores, columns=['AUC Train', 'AUC Test'])
```

```
##### End of performance metric
```

```
# Use KFold
```

```
kf = KFold(n_splits=5, shuffle=True, random_state=1111)
```

```
# Create splits
```

```
splits = kf.split(X)
```

```
# Print the number of indices
```

```
for train_index, val_index in splits:
```

```
    print("Number of training indices: %s" % len(train_index))
```

```
    print("Number of validation indices: %s" % len(val_index))
```

```
from sklearn.model_selection import KFold
```

```
kf = KFold(n_splits=5, shuffle=False).split(range(25))
```

```
# print the contents of each training and testing set
```

```
print('{} {} ^61 {} {}'.format('Iteration', 'Training set observations', 'Testing set observations'))
```

```
for iteration, data in enumerate(kf, start=1):
```

```
    print('{} ^9 {} {} ^25 {}'.format(iteration, data[0], str(data[1])))
```

```
from sklearn.model_selection import cross_val_score
```

```
# K-fold cross-validation with models
```

```
lr = LogisticRegression(random_state=0)
```

```
scores = cross_val_score(lr, X, y, cv=5, scoring='accuracy')
```

```
print(scores)
```

```
import matplotlib.pyplot as plt
```

```
%matplotlib inline
```

```
# plot the value of the cross-validated accuracy (y-axis)
```

```
plt.plot(k_range, k_scores)
```

```
plt.xlabel('Value of K for lr')
```

```
plt.ylabel('Cross-Validated Accuracy')
```

```

# Convert categorical variables into dummy/indicator variables
train_processed = pd.get_dummies(train)
test_processed = pd.get_dummies(test)

# Filling Null Values
train_processed = train_processed.fillna(train_processed.mean())
test_processed = test_processed.fillna(test_processed.mean())

# Create X_train,Y_train,X_test for a specific set for the train and test sets split
X_train = train_processed.drop(['Scoliosis'], axis=1)
y_train = train_processed['Scoliosis']

X_test = test_processed.drop(['Scoliosis'], axis=1)
y_test = test_processed['Scoliosis']

# Display
print("Processed DataFrame for Training : Scoliosis is the Target, other columns are features.")
display(train_processed.head())

from sklearn.feature_selection import mutual_info_classif # Mutual information for a discrete target

#Set a random seed for the notebook so that individual runs of the notebook yield the same
results
randSeed = 99 #changing this value will potentially change the models and results due to
stochastic elements of the pipeline.
np.random.seed(randSeed)

mi_results = mutual_info_classif(X_train, y_train, random_state=randSeed)

#Present results
header = train.columns.tolist()

```

```

features = header[0:len(header)-1]
names_scores = {'Names':features, 'Scores':mi_results}
ns = pd.DataFrame(names_scores)
ns = ns.sort_values(by='Scores')
ns #Report sorted feature scores

#Visualize sorted feature scores
ns['Scores'].plot(kind='barh',figsize=(5,8))
plt.ylabel('Parameters')
plt.xlabel('Mutual Information Score')
plt.xticks(np.arange(len(features)), ns['Names'])
plt.title('Mutual Information of the parameters')

import lime
import lime.lime_tabular

lr.fit(X_train, y_train)
predict_fn_rf = lambda x: lr.predict_proba(x).astype(float)
X = X_train.values
choosen_instance = X_test.loc[[3]].values[0]
exp = explainer.explain_instance(choosen_instance, predict_fn_rf,num_features=20)
exp.show_in_notebook(show_table=True, show_all=False)

```
